# Supplementary material for: Different bacterial gene expression patterns and attenuated host immune responses are associated with the evolution of low-level vancomycin resistance during persistent methicillin-resistant Staphylococcus aureus bacteraemia
Source: PubMed Central journal article supplement (PMC2289824; doi:10.1186/1471-2180-8-39), 2008-02-27
Supplement: 1471-2180-8-39-S2.pdf [file 1471-2180-8-39-S2.pdf]

**Data table 1a.** Genes differentially regulated in hVISA/VISA compared to matched VSSA, up-regulated.

| ORF ID <sup>a</sup>                                                                    | Gene         | TIGR description <sup>b</sup>                                      | Isolate Pair |       |       |       |       |
|----------------------------------------------------------------------------------------|--------------|--------------------------------------------------------------------|--------------|-------|-------|-------|-------|
|                                                                                        |              |                                                                    | 1            | 2     | 3     | 4     | 5     |
| <b>Amino acid biosynthesis:</b>                                                        |              |                                                                    |              |       |       |       |       |
| <i>Aspartate family</i>                                                                |              |                                                                    |              |       |       |       |       |
| SACOL1362                                                                              | <i>hom</i>   | homoserine dehydrogenase                                           | 1.15         | 1.66* | 1.90* | 0.70* | 1.35  |
| SACOL1428                                                                              | <i>lysC</i>  | aspartokinase, alpha and beta subunits                             | 2.20*        | 2.49* | 5.12* | 1.34* | 2.21* |
| SACOL1429                                                                              | <i>asd</i>   | aspartate-semialdehyde dehydrogenase                               | 2.22*        | 2.56* | 3.52* | 0.87  | 1.86* |
| SACOL1430                                                                              | <i>dapA</i>  | dihydrodipicolinate synthase                                       | 2.25*        | 2.51* | 3.03* | 0.72* | 1.77* |
| SACOL1431                                                                              | <i>dapB</i>  | dihydrodipicolinate reductase                                      | 1.92*        | 2.35* | 3.36* | 0.69* | 1.72* |
| SACOL1432                                                                              | <i>dapD</i>  | 2,3,4,5-tetrahydropyridine-2,6-dicarboxylate N-succinyltransferase | 2.18*        | 2.10* | 2.83* | 0.65* | 1.61* |
| <i>Glutamate family</i>                                                                |              |                                                                    |              |       |       |       |       |
| SACOL0514                                                                              | <i>gltB</i>  | glutamate synthase, large subunit                                  | 1.23         | 1.79* | 1.69* | 1.19  | 1.13  |
| <i>Pyruvate family</i>                                                                 |              |                                                                    |              |       |       |       |       |
| SACOL0600                                                                              | <i>ilvE</i>  | branched-chain amino acid aminotransferase                         | 1.44         | 2.06* | 2.16* | 1.21* | 1.24  |
| SACOL2043                                                                              | <i>ilvB</i>  | acetolactate synthase, large subunit, biosynthetic type            | 1.57         | 1.95* | 1.78* | 1.13  | 1.14  |
| SACOL2045                                                                              | <i>ilvC</i>  | ketol-acid reductoisomerase                                        | 1.50         | 1.82* | 1.88* | 1.09  | 1.30  |
| SACOL2046                                                                              | <i>leuA</i>  | 2-isopropylmalate synthase                                         | 1.75*        | 1.73  | 1.85* | 1.16  | 1.19  |
| <b>Biosynthesis of cofactors, prosthetic groups and carriers:</b>                      |              |                                                                    |              |       |       |       |       |
| <i>Glutathione and analogs</i>                                                         |              |                                                                    |              |       |       |       |       |
| SACOL2641                                                                              | <i>gpxA2</i> | glutathione peroxidase                                             | 3.04*        | 1.97* | 2.12* | 1.02  | 1.45  |
| <i>Heme, porphyrin, and cobalamin</i>                                                  |              |                                                                    |              |       |       |       |       |
| SACOL2396                                                                              |              | uroporphyrinogen III methylase SirB, putative                      | 1.59         | 1.47  | 1.87* | 1.34* | 1.83* |
| <b>Cellular Processes:</b>                                                             |              |                                                                    |              |       |       |       |       |
| <i>Adaptions to atypical conditions</i>                                                |              |                                                                    |              |       |       |       |       |
| SACOL1759                                                                              |              | universal stress protein family                                    | 1.11         | 2.17* | 2.54* | 1.05  | 1.79* |
| SACOL2131                                                                              |              | Dps family protein                                                 | 0.93         | 2.04  | 2.76* | 1.60* | 1.84  |
| <i>Detoxification</i>                                                                  |              |                                                                    |              |       |       |       |       |
| SACOL1368                                                                              | <i>kataA</i> | catalase                                                           | 1.08         | 1.93* | 1.46  | 1.06  | 1.52* |
| <i>Pathogenesis</i>                                                                    |              |                                                                    |              |       |       |       |       |
| SACOL0270                                                                              |              | staphyloxanthin biosynthesis protein, putative                     | 2.14*        | 1.06  | 1.61* | 0.75* | 1.35  |
| <i>Others</i>                                                                          |              |                                                                    |              |       |       |       |       |
| SACOL1440                                                                              |              | xpaC protein, putative                                             | 0.99         | 1.53* | 1.37* | 1.61* | 1.07  |
| <b>Cell envelope:</b>                                                                  |              |                                                                    |              |       |       |       |       |
| <i>Biosynthesis and degradation of murein sacculus and peptidoglycan</i>               |              |                                                                    |              |       |       |       |       |
| SACOL0248                                                                              | <i>lrgB</i>  | lrgB protein                                                       | 0.75         | 1.69* | 2.08* | 0.73  | 1.61* |
| <i>Biosynthesis and degradation of surface polysaccharides and lipopolysaccharides</i> |              |                                                                    |              |       |       |       |       |
| SACOL0136                                                                              | <i>cap5A</i> | capsular polysaccharide biosynthesis protein Cap5A                 | 2.13*        | 2.04* | 1.27  | 2.53* | 0.96  |
| SACOL0137                                                                              | <i>cap5B</i> | capsular polysaccharide biosynthesis protein Cap5B                 | 1.99         | 2.02* | 1.39* | 2.91* | 0.94  |
| SACOL0139                                                                              | <i>cap5D</i> | capsular polysaccharide biosynthesis protein Cap5D                 | 1.75         | 1.82* | 1.25  | 2.05* | 0.96  |
| SACOL0140                                                                              | <i>cap5E</i> | capsular polysaccharide biosynthesis protein Cap5E                 | 2.27         | 2.06* | 1.40* | 2.64* | 0.80  |
| SACOL0141                                                                              | <i>cap5F</i> | capsular polysaccharide biosynthesis protein Cap5F                 | 1.94         | 2.42* | 1.62* | 2.29* | 0.94  |
| <i>Other</i>                                                                           |              |                                                                    |              |       |       |       |       |
| SACOL2539                                                                              | <i>srtA</i>  | sortase                                                            | 1.20         | 1.63  | 1.79* | 1.02  | 1.62* |
| <b>Central intermediary metabolism:</b>                                                |              |                                                                    |              |       |       |       |       |
| <i>Nitrogen metabolism</i>                                                             |              |                                                                    |              |       |       |       |       |
| SACOL2280                                                                              | <i>ureA</i>  | urease, gamma subunit                                              | 3.75*        | 1.40  | 1.82* | 2.69* | 0.73  |

|                                                           |              |                                                                |       |       |       |       |       |
|-----------------------------------------------------------|--------------|----------------------------------------------------------------|-------|-------|-------|-------|-------|
| SACOL2281                                                 | <i>ureB</i>  | urease, beta subunit                                           | 3.65  | 1.43  | 1.93* | 2.78* | 0.67  |
| SACOL2282                                                 | <i>ureC</i>  | urease, alpha subunit                                          | 4.96* | 1.36  | 2.01* | 3.14* | 0.62* |
| SACOL2283                                                 | <i>ureE</i>  | urease accessory protein UreE                                  | 2.95* | 1.41  | 1.89* | 3.20* | 0.78  |
| SACOL2284                                                 | <i>ureF</i>  | urease accessory protein UreF                                  | 4.27* | 1.36  | 1.73* | 3.19* | 0.66* |
| SACOL2285                                                 | <i>ureG</i>  | urease accessory protein UreG                                  | 3.71* | 1.36  | 1.63* | 2.94* | 0.73* |
| SACOL2286                                                 | <i>ureD</i>  | urease accessory protein UreD                                  | 3.04* | 1.51  | 1.72* | 2.85* | 0.84  |
| SACOL2394                                                 | <i>narH</i>  | respiratory nitrate reductase, beta subunit                    | 1.20  | 1.64  | 1.97* | 1.58* | 1.99  |
| SACOL2395                                                 | <i>narG</i>  | respiratory nitrate reductase, alpha subunit                   | 1.15  | 1.35* | 1.90* | 1.44* | 1.70* |
| SACOL2397                                                 | <i>nirD</i>  | nitrite reductase [NAD(P)H], small subunit                     | 1.45* | 1.30  | 1.79* | 1.58* | 1.75* |
| <b>Other</b>                                              |              |                                                                |       |       |       |       |       |
| SACOL1920                                                 |              | D-isomer specific 2-hydroxyacid dehydrogenase family protein   | 1.08  | 1.75* | 1.57* | 1.01  | 1.30  |
| SACOL2574                                                 |              | D-isomer specific 2-hydroxyacid dehydrogenase family protein   | 1.31  | 2.32* | 2.23* | 1.07  | 1.56  |
| <b>DNA metabolism:</b>                                    |              |                                                                |       |       |       |       |       |
| <b>Replication, recombination, repair</b>                 |              |                                                                |       |       |       |       |       |
| SACOL2562                                                 | <i>ogt</i>   | methylated-DNA--protein-cysteine methyltransferase             | 1.14  | 1.58* | 1.88* | 1.00  | 1.44  |
| <b>Other</b>                                              |              |                                                                |       |       |       |       |       |
| SACOL0880                                                 |              | Toprim domain protein                                          | 1.23  | 1.53  | 1.50* | 1.05  | 1.66* |
| <b>Energy metabolism:</b>                                 |              |                                                                |       |       |       |       |       |
| <b>Fermentation</b>                                       |              |                                                                |       |       |       |       |       |
| SACOL0111                                                 |              | acetoin reductase                                              | 1.05  | 1.80* | 2.33* | 1.34* | 1.53  |
| SACOL1984                                                 | <i>aldA2</i> | aldehyde dehydrogenase                                         | 1.04  | 1.77* | 1.60* | 1.26* | 1.21  |
| SACOL2178                                                 |              | alcohol dehydrogenase, zinc-containing                         | 1.59  | 1.86* | 2.09* | 1.09  | 1.34  |
| <b>TCA cycle</b>                                          |              |                                                                |       |       |       |       |       |
| SACOL1449                                                 | <i>sucA</i>  | 2-oxoglutarate dehydrogenase, E1 component                     | 1.81* | 0.78  | 1.07  | 1.66* | 0.89  |
| <b>Fatty acid and phospholipid metabolism:</b>            |              |                                                                |       |       |       |       |       |
| <b>Biosynthesis</b>                                       |              |                                                                |       |       |       |       |       |
| SACOL1351                                                 | <i>cls1</i>  | cardiolipin synthetase                                         | 1.24  | 1.93* | 2.01* | 1.24  | 1.65  |
| <b>Protein fate:</b>                                      |              |                                                                |       |       |       |       |       |
| <b>Protein folding and stabilization</b>                  |              |                                                                |       |       |       |       |       |
| SACOL2385                                                 |              | heat shock protein, Hsp20 family                               | 1.53* | 1.53* | 1.61* | 1.51* | 1.32  |
| <b>Protein synthesis:</b>                                 |              |                                                                |       |       |       |       |       |
| <b>Translation factors</b>                                |              |                                                                |       |       |       |       |       |
| SACOL0815                                                 |              | ribosomal subunit interface protein                            | 1.17  | 2.53* | 2.10* | 0.92  | 1.74* |
| <b>Ribosomal proteins: synthesis and modification</b>     |              |                                                                |       |       |       |       |       |
| SACOL1369                                                 | <i>rpmG1</i> | ribosomal protein L33                                          | 1.10  | 2.24* | 1.54* | 0.88  | 1.80  |
| <b>tRNA aminoacylation</b>                                |              |                                                                |       |       |       |       |       |
| SACOL0009                                                 | <i>serS</i>  | seryl-tRNA synthetase                                          | 1.89* | 2.42* | 2.27* | 1.57* | 1.34  |
| <b>Purines, pyrimidines, nucleosides and nucleotides:</b> |              |                                                                |       |       |       |       |       |
| <b>2'-Deoxyribonucleotide metabolism</b>                  |              |                                                                |       |       |       |       |       |
| SACOL0790.1                                               |              | ribonucleoside-diphosphate reductase 2, NrdH-redoxin, putative | 0.55* | 1.59* | 1.08  | 1.18* | 1.52* |
| SACOL0792                                                 | <i>nrdE</i>  | ribonucleoside-diphosphate reductase 2, alpha subunit          | 0.84  | 1.58* | 1.54* | 1.29  | 1.23  |
| SACOL1622                                                 | <i>glyS</i>  | glycyl-tRNA synthetase                                         | 1.15  | 1.64* | 1.48* | 1.72* | 1.49* |
| <b>Regulatory Functions:</b>                              |              |                                                                |       |       |       |       |       |
| <b>DNA interactions</b>                                   |              |                                                                |       |       |       |       |       |
| SACOL1997                                                 |              | transcriptional regulator, GntR family                         | 1.19  | 1.02  | 1.56* | 1.91* | 0.71  |
| SACOL2193                                                 |              | transcriptional regulator, MerR family                         | 1.13  | 1.97* | 1.86* | 1.68* | 1.40* |
| SACOL2517                                                 |              | transcriptional regulator, MerR family                         | 1.67* | 2.67* | 0.97  | 1.47* | 1.28  |

|                                            |             |                                                                      |       |       |       |       |       |
|--------------------------------------------|-------------|----------------------------------------------------------------------|-------|-------|-------|-------|-------|
| <b>Other</b>                               |             |                                                                      |       |       |       |       |       |
| SACOL2585                                  |             | regulatory protein, putative                                         | 0.88  | 2.60* | 1.81* | 0.51* | 1.67  |
| <b>Signal transduction:</b>                |             |                                                                      |       |       |       |       |       |
| <b>2-component system</b>                  |             |                                                                      |       |       |       |       |       |
| SACOL1942                                  | <i>vraR</i> | DNA-binding response regulator VraR                                  | 1.40  | 1.83* | 0.45* | 1.78* | 0.77  |
| SACOL1943                                  | <i>vraS</i> | sensor histidine kinase VraS                                         | 1.45  | 2.34* | 0.48* | 1.82* | 0.75* |
| <b>Transport and binding proteins:</b>     |             |                                                                      |       |       |       |       |       |
| <b>Anions</b>                              |             |                                                                      |       |       |       |       |       |
| SACOL2386                                  |             | nitrite extrusion protein                                            | 1.32  | 1.39  | 1.77* | 2.08* | 1.59* |
| <b>Cations and iron carrying compounds</b> |             |                                                                      |       |       |       |       |       |
| SACOL0686                                  |             | Na <sup>+</sup> /H <sup>+</sup> antiporter, MnhG component, putative | 0.85  | 1.62* | 0.99  | 1.68* | 0.93  |
| SACOL2166                                  |             | iron compound ABC transporter, permease protein                      | 1.05  | 0.99  | 1.54* | 1.64* | 1.03  |
| <b>Unknown substrate</b>                   |             |                                                                      |       |       |       |       |       |
| SACOL0882                                  |             | ABC transporter, ATP-binding protein                                 | 1.49  | 2.30* | 1.97* | 1.53* | 1.85* |
| SACOL0883                                  |             | ABC transporter, permease protein                                    | 1.50* | 2.24* | 1.80* | 1.35  | 1.79* |
| SACOL0884                                  |             | ABC transporter, substrate-binding protein                           | 1.35  | 2.47* | 1.72* | 1.20  | 1.81* |
| SACOL2279                                  |             | transporter, putative                                                | 2.35* | 1.74  | 2.05* | 1.65* | 0.81  |
| <b>Other</b>                               |             |                                                                      |       |       |       |       |       |
| SACOL2348                                  |             | drug transporter, putative                                           | 0.84  | 1.46  | 1.56* | 1.04  | 1.69* |
| SACOL2619                                  |             | amino acid permease                                                  | 1.26  | 2.82* | 1.80* | 0.54* | 1.58* |
| <b>Unknown Functions:</b>                  |             |                                                                      |       |       |       |       |       |
| <b>Enzymes of unknown specificity</b>      |             |                                                                      |       |       |       |       |       |
| SACOL0399                                  |             | oxidoreductase, putative                                             | 1.29  | 1.61* | 1.78* | 1.21* | 1.32  |
| SACOL0655                                  |             | oxidoreductase, aldo/keto reductase family                           | 1.22  | 1.41* | 1.66* | 0.65* | 1.16  |
| SACOL1543                                  |             | oxidoreductase, aldo/keto reductase family                           | 1.67* | 1.70* | 1.86* | 1.03  | 1.30  |
| SACOL1772                                  |             | aminotransferase, class V                                            | 1.00  | 2.58* | 1.56* | 1.00  | 1.37  |
| SACOL1774                                  |             | hydrolase, haloacid dehalogenase-like family                         | 1.25  | 1.60* | 1.56* | 1.21  | 1.25  |
| SACOL2192                                  |             | oxidoreductase, aldo/keto reductase family                           | 1.53  | 1.98  | 1.86* | 1.59* | 1.38  |
| SACOL2575                                  |             | aminotransferase, class I                                            | 1.45  | 2.28* | 2.08* | 1.11  | 1.58  |
| SACOL2620                                  |             | aminotransferase, class III                                          | 1.08  | 3.44* | 2.63* | 0.45* | 1.72* |
| <b>General</b>                             |             |                                                                      |       |       |       |       |       |
| SACOL0089                                  |             | antigen, 67 kDa                                                      | 1.42  | 1.63* | 1.54* | 1.12  | 1.11  |
| SACOL0220                                  |             | flavohepotein, putative                                              | 1.25  | 1.91* | 1.97* | 0.82* | 1.42* |
| SACOL1553                                  |             | glyoxalase family protein                                            | 0.89  | 1.64  | 1.68* | 1.51* | 1.62* |
| SACOL2088                                  |             | sceD protein, putative                                               | 2.65* | 2.01* | 3.70* | 2.62* | 1.58  |
| SACOL2522                                  |             | DedA family protein                                                  | 1.13  | 1.57* | 1.55* | 1.37* | 1.23  |
| <b>Hypothetical proteins:</b>              |             |                                                                      |       |       |       |       |       |
| SACOL2344                                  |             | hypothetical protein                                                 | 1.23  | 2.00* | 2.02* | 1.18* | 1.49  |
| SAV2383                                    |             | assimilatory nitrite reductase [NAD(P)H]<br>small subunit            | 1.16  | 1.23  | 1.64* | 1.41* | 1.58* |
| <b>Conserved</b>                           |             |                                                                      |       |       |       |       |       |
| SACOL0467                                  |             | conserved hypothetical protein                                       | 1.42  | 2.54* | 3.65* | 1.23* | 1.79* |
| SACOL0597                                  |             | conserved hypothetical protein                                       | 1.08  | 1.77* | 1.47* | 0.89* | 1.58* |
| SACOL0669                                  |             | conserved hypothetical protein                                       | 1.05  | 1.51* | 1.12  | 0.95  | 1.77* |
| SACOL1944                                  |             | conserved hypothetical protein (match to 1942/43)                    | 1.19  | 2.50* | 0.48* | 1.70* | 0.79  |
| SACOL1956                                  |             | conserved hypothetical protein                                       | 1.17  | 1.69* | 0.42* | 1.76* | 0.77  |
| SACOL2550                                  |             | conserved hypothetical protein                                       | 1.37  | 2.36* | 2.12* | 1.50* | 1.36  |
| SACOL2551                                  |             | conserved hypothetical protein TIGR00051                             | 1.23  | 2.33* | 2.02* | 1.86* | 1.49  |
| SACOL2710                                  |             | conserved hypothetical protein                                       | 1.42  | 2.31* | 1.66* | 0.67* | 1.31  |

**Data table 1b.** Genes differentially regulated in hVISA/VISA compared to matched VSSA, down-regulated.

| ORF ID <sup>a</sup>                                                                    | Gene        | TIGR description <sup>b</sup>                              | Isolate pair |       |       |       |       |
|----------------------------------------------------------------------------------------|-------------|------------------------------------------------------------|--------------|-------|-------|-------|-------|
|                                                                                        |             |                                                            | 1            | 2     | 3     | 4     | 5     |
| <b>Biosynthesis of cofactors, prosthetic groups and carriers:</b>                      |             |                                                            |              |       |       |       |       |
| <i>Pyridoxine</i>                                                                      |             |                                                            |              |       |       |       |       |
| SACOL0564                                                                              |             | pyridoxine biosynthesis protein                            | 0.97         | 0.50* | 0.72* | 0.85  | 0.59* |
| <b>Cell envelope:</b>                                                                  |             |                                                            |              |       |       |       |       |
| <i>Biosynthesis and degradation of surface polysaccharides and lipopolysaccharides</i> |             |                                                            |              |       |       |       |       |
| SACOL1043                                                                              |             | glycosyl transferase, group 1 family protein               | 0.40*        | 0.36  | 0.70* | 0.60* | 0.96  |
| <i>Other</i>                                                                           |             |                                                            |              |       |       |       |       |
| SACOL2354                                                                              |             | membrane protein, putative                                 | 0.69         | 0.86  | 0.65* | 0.52* | 0.95  |
| SACOL2520                                                                              |             | membrane protein, putative                                 | 0.76         | 0.68* | 0.57  | 1.12  | 0.54* |
| <b>Cellular Processes:</b>                                                             |             |                                                            |              |       |       |       |       |
| <i>Pathogenesis</i>                                                                    |             |                                                            |              |       |       |       |       |
| SACOL0095                                                                              | <i>spa</i>  | immunoglobulin G binding protein A precursor               | 0.12*        | 0.08* | 0.19* | 0.11* | 0.98  |
| SACOL2291                                                                              |             | staphyloxanthin biosynthesis protein                       | 1.24         | 0.37* | 0.62* | 1.40* | 0.65  |
| SACOL2418                                                                              |             | IgG-binding protein SBI                                    | 0.57*        | 0.31* | 0.21* | 0.31* | 0.41  |
| SACOL2509                                                                              | <i>fnbB</i> | fibronectin binding protein B                              | 0.47*        | 0.37* | 0.37* | 0.84  | 0.96  |
| SACOL2511                                                                              | <i>fnbA</i> | fibronectin-binding protein A                              | 0.89         | 0.66* | 0.59* | 1.00  | 0.83  |
| <i>Toxin production and resistance</i>                                                 |             |                                                            |              |       |       |       |       |
| SACOL0478                                                                              |             | exotoxin 3, putative                                       | 0.79         | 0.83  | 0.60* | 0.66* | 0.99  |
| <b>DNA metabolism:</b>                                                                 |             |                                                            |              |       |       |       |       |
| <i>Replication, recombination, repair</i>                                              |             |                                                            |              |       |       |       |       |
| SACOL0678                                                                              |             | integrase/recombinase, phage integrase family              | 0.69         | 0.60* | 0.48* | 1.28* | 0.63* |
| <b>Energy metabolism:</b>                                                              |             |                                                            |              |       |       |       |       |
| <i>Amino acids and amines</i>                                                          |             |                                                            |              |       |       |       |       |
| SACOL2327                                                                              | <i>hutG</i> | formiminoglutamase                                         | 0.54*        | 0.85  | 0.80  | 0.62* | 0.93  |
| <i>ATP-proton motive force interconversion</i>                                         |             |                                                            |              |       |       |       |       |
| SACOL2101                                                                              | <i>atpB</i> | ATP synthase F0, A subunit                                 | 1.27         | 0.66  | 0.66* | 0.64* | 0.75  |
| <b>Protein fate:</b>                                                                   |             |                                                            |              |       |       |       |       |
| <i>Protein and peptide secretion and trafficking</i>                                   |             |                                                            |              |       |       |       |       |
| SACOL1251                                                                              |             | cell division protein FtsY, putative                       | 1.02         | 0.61* | 0.66* | 1.69* | 0.81  |
| <b>Protein synthesis:</b>                                                              |             |                                                            |              |       |       |       |       |
| <i>Ribosomal proteins: synthesis and modification</i>                                  |             |                                                            |              |       |       |       |       |
| SACOL1702                                                                              | <i>rplU</i> | ribosomal protein L21                                      | 0.82         | 0.59* | 0.56* | 1.02  | 0.79  |
| <i>Translation factors</i>                                                             |             |                                                            |              |       |       |       |       |
| SACOL1278                                                                              | <i>frr</i>  | ribosome recycling factor                                  | 0.75         | 0.53* | 0.62* | 0.97  | 0.66* |
| <i>tRNA aminoacylation</i>                                                             |             |                                                            |              |       |       |       |       |
| SACOL1962                                                                              | <i>gatC</i> | glutamyl-tRNA(Gln) amidotransferase, C subunit             | 0.83         | 0.70  | 0.39* | 0.47* | 0.76  |
| <i>tRNA and rRNA base modification</i>                                                 |             |                                                            |              |       |       |       |       |
| SACOL1695                                                                              | <i>queA</i> | S-adenosylmethionine:<br>tRNA ribosyltransferase-isomerase | 0.93         | 0.57* | 0.61* | 1.48* | 0.75  |

**Purines, pyrimidines, nucleosides and nucleotides:*****Nucleotide and nucleoside interconversions***

|           |             |                    |       |       |       |       |       |
|-----------|-------------|--------------------|-------|-------|-------|-------|-------|
| SACOL1277 | <i>pyrH</i> | uridylylate kinase | 0.68  | 0.53* | 0.46* | 0.79* | 0.65* |
| SACOL1371 | <i>guaC</i> | GMP reductase      | 0.41* | 0.45* | 0.53* | 1.16* | 0.65  |
| SACOL2111 | <i>tdk</i>  | thymidine kinase   | 0.93  | 0.47* | 0.60* | 1.17* | 0.71  |

***Pyrimidine ribonucleotide biosynthesis***

|           |             |                                             |      |       |       |      |       |
|-----------|-------------|---------------------------------------------|------|-------|-------|------|-------|
| SACOL1214 | <i>carA</i> | carbamoyl-phosphate synthase, small subunit | 1.35 | 0.38* | 0.62* | 0.75 | 0.55  |
| SACOL1216 | <i>pyrF</i> | orotidine 5-phosphate decarboxylase         | 1.63 | 0.37* | 0.63* | 0.73 | 0.55* |

***Salvage of nucleosides and nucleotides***

|           |            |                                     |      |       |       |      |      |
|-----------|------------|-------------------------------------|------|-------|-------|------|------|
| SACOL2128 | <i>pdp</i> | pyrimidine-nucleoside phosphorylase | 0.78 | 0.59* | 0.65* | 0.94 | 0.85 |
|-----------|------------|-------------------------------------|------|-------|-------|------|------|

**Regulatory Functions:*****DNA interactions***

|           |  |                                                             |      |      |       |       |      |
|-----------|--|-------------------------------------------------------------|------|------|-------|-------|------|
| SACOL2308 |  | phosphosugar-binding transcriptional regulator, RpiR family | 0.82 | 0.60 | 0.47* | 0.53* | 0.83 |
|-----------|--|-------------------------------------------------------------|------|------|-------|-------|------|

***RNA interactions***

|           |             |                                      |      |      |       |       |      |
|-----------|-------------|--------------------------------------|------|------|-------|-------|------|
| SACOL1210 | <i>pyrR</i> | pyrimidine operon regulatory protein | 0.74 | 0.46 | 0.41* | 0.43* | 0.59 |
|-----------|-------------|--------------------------------------|------|------|-------|-------|------|

***Other***

|           |             |                                     |      |       |       |       |       |
|-----------|-------------|-------------------------------------|------|-------|-------|-------|-------|
| SACOL1904 |             | transcriptional regulator, putative | 0.78 | 0.82  | 0.62* | 0.52* | 0.80  |
| MW1960    | <i>agrB</i> | accessory gene regulator B          | 0.75 | 0.33* | 0.28* | 1.27  | 0.60* |
| SACOL2023 | <i>agrB</i> | accessory gene regulator protein B  | 0.73 | 0.53* | 0.28* | 0.99  | 0.77  |
| SACOL2026 | <i>agrA</i> | accessory gene regulator protein A  | 0.80 | 0.34* | 0.20* | 1.34  | 0.45* |

**Transport and binding proteins:*****Amino acids, peptides and amines***

|           |  |                                                            |      |       |       |       |      |
|-----------|--|------------------------------------------------------------|------|-------|-------|-------|------|
| SACOL1108 |  | spermidine/putrescine ABC transporter, ATP-binding protein | 1.08 | 0.35* | 0.51* | 1.12  | 0.76 |
| SACOL1110 |  | spermidine/putrescine ABC transporter, permease protein    | 0.86 | 0.42* | 0.42* | 0.89  | 0.86 |
| SACOL2382 |  | proton/sodium-glutamate symport protein                    | 1.07 | 0.90  | 0.60* | 0.63* | 0.81 |

***Carbohydrates, organic alcohols and acids***

|           |  |                                               |      |       |       |       |       |
|-----------|--|-----------------------------------------------|------|-------|-------|-------|-------|
| SACOL0175 |  | PTS system, IIABC components                  | 0.83 | 0.61* | 0.72* | 0.51* | 0.85  |
| SACOL0454 |  | sodium:dicarboxylate symporter family protein | 0.72 | 0.56* | 0.63* | 0.82  | 0.68* |

***Cations and iron carrying compounds***

|           |  |                                                                      |      |      |       |       |       |
|-----------|--|----------------------------------------------------------------------|------|------|-------|-------|-------|
| SACOL0679 |  | Na <sup>+</sup> /H <sup>+</sup> antiporter, MnhA component, putative | 0.71 | 1.05 | 0.65* | 1.59* | 0.66* |
|-----------|--|----------------------------------------------------------------------|------|------|-------|-------|-------|

***Nucleosides, purines, pyrimidines***

|           |             |                 |      |      |       |      |       |
|-----------|-------------|-----------------|------|------|-------|------|-------|
| SACOL1211 | <i>uraA</i> | uracil permease | 0.77 | 0.51 | 0.58* | 0.77 | 0.59* |
|-----------|-------------|-----------------|------|------|-------|------|-------|

***Unknown substrate***

|           |  |                                   |      |       |       |      |       |
|-----------|--|-----------------------------------|------|-------|-------|------|-------|
| SACOL0159 |  | ABC transporter, permease protein | 1.31 | 0.47* | 0.59* | 0.99 | 0.52* |
|-----------|--|-----------------------------------|------|-------|-------|------|-------|

**Unknown Functions:*****General***

|           |            |                                                      |      |       |       |       |       |
|-----------|------------|------------------------------------------------------|------|-------|-------|-------|-------|
| SACOL0507 |            | LysM domain protein                                  | 0.81 | 0.26* | 0.46* | 0.78* | 0.54* |
| SACOL1164 |            | fibrinogen binding-related protein                   | 0.97 | 0.82  | 0.57* | 0.64* | 1.09  |
| SACOL1168 | <i>efb</i> | fibrinogen-binding protein                           | 1.05 | 0.39  | 0.30* | 0.45* | 0.45  |
| SACOL1169 |            | fibrinogen-binding protein precursor-related protein | 0.80 | 0.46  | 0.42* | 0.57* | 0.66  |
| SACOL2591 |            | actVA 4 protein                                      | 0.88 | 0.91  | 0.64* | 0.65* | 0.82  |

**Hypothetical proteins:**

|         |  |                  |      |       |       |       |      |
|---------|--|------------------|------|-------|-------|-------|------|
| SAV0411 |  | exotoxin homolog | 0.85 | 0.61* | 0.69* | 0.51* | 0.94 |
|---------|--|------------------|------|-------|-------|-------|------|

***Conserved***

|           |  |                                |      |       |       |       |       |
|-----------|--|--------------------------------|------|-------|-------|-------|-------|
| SACOL0157 |  | conserved hypothetical protein | 1.09 | 0.38* | 0.41* | 1.07  | 0.52* |
| SACOL0160 |  | conserved hypothetical protein | 1.20 | 0.59* | 0.74* | 0.87  | 0.59* |
| SACOL0199 |  | conserved hypothetical protein | 0.73 | 0.57  | 0.43* | 0.42* | 0.61  |
| SACOL0767 |  | conserved hypothetical protein | 0.85 | 0.63  | 0.39* | 1.28* | 0.51* |
| SACOL0802 |  | conserved hypothetical protein | 1.07 | 0.78  | 0.57* | 0.57* | 0.71  |
| SACOL1821 |  | conserved hypothetical protein | 1.07 | 0.88  | 0.60* | 0.55* | 0.89  |
| SACOL2020 |  | conserved hypothetical protein | 0.49 | 0.85  | 1.02  | 0.66  | 1.00  |

|               |                                    |       |       |       |       |      |
|---------------|------------------------------------|-------|-------|-------|-------|------|
| SACOL2373     | conserved hypothetical protein     | 0.56* | 0.66  | 0.59* | 0.47* | 0.86 |
| SACOL2461     | conserved hypothetical protein     | 0.83  | 0.76  | 0.53* | 0.44* | 1.03 |
| <b>Domain</b> |                                    |       |       |       |       |      |
| SACOL1847     | conserved domain protein, putative | 0.80  | 0.28* | 0.63* | 0.71* | 0.69 |

---

**Data table 1c.** Genes differentially regulated in hVISA/VISA compared to matched VSSA after vancomycin exposure, up-regulated.

| ORF ID <sup>a</sup>                                                                    | Gene         | TIGR description <sup>b</sup>                                    | Isolate pair |       |       |       |       |
|----------------------------------------------------------------------------------------|--------------|------------------------------------------------------------------|--------------|-------|-------|-------|-------|
|                                                                                        |              |                                                                  | 1            | 2     | 3     | 4     | 5     |
| <b>Amino acid biosynthesis:</b>                                                        |              |                                                                  |              |       |       |       |       |
| <i>Pyruvate family</i>                                                                 |              |                                                                  |              |       |       |       |       |
| SACOL0600                                                                              | <i>ilvE</i>  | branched-chain amino acid aminotransferase                       | 1.04         | 2.10* | 1.89* | 1.07  | 1.17  |
| <b>Biosynthesis of cofactors, prosthetic groups and carriers:</b>                      |              |                                                                  |              |       |       |       |       |
| <i>Glutathione and analogs</i>                                                         |              |                                                                  |              |       |       |       |       |
| SACOL2641                                                                              | <i>gpxA2</i> | glutathione peroxidase                                           | 3.19*        | 1.27  | 2.17* | 1.04  | 1.06  |
| <i>Other</i>                                                                           |              |                                                                  |              |       |       |       |       |
| SACOL0538                                                                              | <i>ispE</i>  | 4-diphosphocytidyl-2C-methyl-D-erythritol kinase                 | 2.75*        | 0.78  | 0.76  | 1.52* | 0.87  |
| <b>Cell envelope:</b>                                                                  |              |                                                                  |              |       |       |       |       |
| <i>Biosynthesis and degradation of surface polysaccharides and lipopolysaccharides</i> |              |                                                                  |              |       |       |       |       |
| SACOL0136                                                                              | <i>cap5A</i> | capsular polysaccharide biosynthesis protein Cap5A               | 3.23*        | 1.37  | 0.93  | 3.80* | 0.95  |
| SACOL0137                                                                              | <i>cap5B</i> | capsular polysaccharide biosynthesis protein Cap5B               | 2.81*        | 1.21  | 1.18  | 3.62* | 1.01  |
| SACOL0138                                                                              | <i>cap5C</i> | capsular polysaccharide biosynthesis protein Cap5C               | 3.58*        | 1.54  | 1.21  | 4.46* | 1.24  |
| SACOL0139                                                                              | <i>cap5D</i> | capsular polysaccharide biosynthesis protein Cap5D               | 3.52*        | 1.26  | 1.04  | 4.39* | 0.84  |
| SACOL0140                                                                              | <i>cap5E</i> | capsular polysaccharide biosynthesis protein Cap5E               | 3.76*        | 1.50  | 1.25  | 4.88* | 1.02  |
| SACOL0141                                                                              | <i>cap5F</i> | capsular polysaccharide biosynthesis protein Cap5F               | 2.65*        | 1.32  | 1.27  | 3.69* | 1.26  |
| SACOL0142                                                                              | <i>cap5G</i> | capsular polysaccharide biosynthesis protein Cap5G               | 2.32*        | 1.39  | 1.94  | 3.81* | 0.97  |
| SACOL0147                                                                              | <i>cap5L</i> | capsular polysaccharide biosynthesis protein Cap5L               | 1.59*        | 1.54  | 2.06  | 1.73* | 1.14  |
| SACOL1062                                                                              | <i>atl</i>   | bifunctional autolysin                                           | 1.62*        | 1.49* | 1.56* | 1.04  | 1.20  |
| SACOL1522                                                                              |              | elastin binding protein, putative                                | 1.54*        | 1.49* | 1.88* | 1.10  | 1.31  |
| <i>Other</i>                                                                           |              |                                                                  |              |       |       |       |       |
| SACOL0466                                                                              |              | membrane protein, putative                                       | 1.42         | 1.59* | 1.61* | 0.92  | 1.32* |
| SACOL2676                                                                              |              | LPXTG cell wall surface anchor family protein                    | 1.87*        | 1.17  | 1.64  | 1.70* | 1.04  |
| <b>Cellular Processes:</b>                                                             |              |                                                                  |              |       |       |       |       |
| <i>Detoxification</i>                                                                  |              |                                                                  |              |       |       |       |       |
| SACOL1368                                                                              | <i>kataA</i> | catalase                                                         | 1.24         | 1.95* | 2.00* | 1.36  | 1.55* |
| <i>DNA transformation</i>                                                              |              |                                                                  |              |       |       |       |       |
| SACOL1003                                                                              |              | negative regulator of competence MecA, putative                  | 1.10         | 1.57* | 0.99  | 2.42* | 1.21  |
| <i>Pathogenesis</i>                                                                    |              |                                                                  |              |       |       |       |       |
| SACOL0856                                                                              | <i>clfA</i>  | clumping factor A                                                | 2.13*        | 1.48  | 1.14  | 1.86* | 1.02  |
| <i>Toxin production and resistance</i>                                                 |              |                                                                  |              |       |       |       |       |
| SACOL0086                                                                              |              | drug transporter, putative                                       | 1.05         | 1.54* | 0.99  | 1.57* | 1.87  |
| SACOL0672                                                                              | <i>sarA</i>  | staphylococcal accessory regulator A                             | 1.80*        | 1.81* | 1.69* | 1.85* | 0.95  |
| SACOL2347                                                                              |              | drug resistance transporter, EmrB/QacA subfamily                 | 1.17         | 1.69* | 1.93* | 0.73  | 1.99* |
| SACOL2348                                                                              |              | drug transporter, putative                                       | 1.11         | 1.28  | 1.97* | 0.69  | 1.56* |
| <b>Central intermediary metabolism:</b>                                                |              |                                                                  |              |       |       |       |       |
| <i>Amino sugars</i>                                                                    |              |                                                                  |              |       |       |       |       |
| SACOL2145                                                                              | <i>glmS</i>  | glucosamine--fructose-6-phosphate aminotransferase (isomerizing) | 1.89*        | 1.65  | 1.33* | 1.63* | 1.05  |
| <i>Nitrogen metabolism</i>                                                             |              |                                                                  |              |       |       |       |       |
| SACOL2280                                                                              | <i>ureA</i>  | urease, gamma subunit                                            | 3.37*        | 0.85  | 1.31  | 2.48* | 0.68  |
| SACOL2281                                                                              | <i>ureB</i>  | urease, beta subunit                                             | 2.89*        | 0.95  | 1.15  | 2.12* | 0.55  |
| SACOL2282                                                                              | <i>ureC</i>  | urease, alpha subunit                                            | 5.32*        | 0.98  | 1.10  | 2.76* | 0.75  |
| SACOL2283                                                                              | <i>ureE</i>  | urease accessory protein UreE                                    | 3.49*        | 0.89  | 1.04  | 2.61* | 0.61* |
| SACOL2284                                                                              | <i>ureF</i>  | urease accessory protein UreF                                    | 4.39*        | 1.07  | 1.05  | 2.85* | 0.75  |
| SACOL2285                                                                              | <i>ureG</i>  | urease accessory protein UreG                                    | 3.81*        | 1.05  | 1.15  | 2.80* | 0.77  |

|                                                              |             |                                                                |       |       |       |       |       |
|--------------------------------------------------------------|-------------|----------------------------------------------------------------|-------|-------|-------|-------|-------|
| SACOL2286                                                    | <i>ureD</i> | urease accessory protein UreD                                  | 3.19* | 1.02  | 1.18  | 2.52* | 0.72* |
| SACOL2397                                                    | <i>nirD</i> | nitrite reductase [NAD(P)H], small subunit                     | 1.39  | 1.06  | 1.10  | 1.55* | 1.68* |
| <b>Energy metabolism:</b>                                    |             |                                                                |       |       |       |       |       |
| <b><i>Glycolysis/gluconeogenesis</i></b>                     |             |                                                                |       |       |       |       |       |
| SACOL1745                                                    | <i>pyk</i>  | pyruvate kinase                                                | 1.17  | 1.88* | 1.31  | 1.00  | 1.54* |
| <b><i>Sugars</i></b>                                         |             |                                                                |       |       |       |       |       |
| SACOL2149                                                    | <i>mitD</i> | mannitol-1-phosphate 5-dehydrogenase                           | 1.46  | 1.70* | 1.53* | 0.84  | 1.29* |
| <b><i>Other</i></b>                                          |             |                                                                |       |       |       |       |       |
| SACOL2553                                                    |             | pyruvate oxidase                                               | 1.35  | 2.14* | 1.52* | 0.76  | 1.53* |
| <b>Protein synthesis:</b>                                    |             |                                                                |       |       |       |       |       |
| <b><i>Ribosomal proteins: synthesis and modification</i></b> |             |                                                                |       |       |       |       |       |
| SACOL1254                                                    | <i>rpsP</i> | ribosomal protein S16                                          | 1.12  | 1.15  | 2.18* | 1.60* | 1.03  |
| <b><i>tRNA aminoacylation</i></b>                            |             |                                                                |       |       |       |       |       |
| SACOL0009                                                    | <i>serS</i> | seryl-tRNA synthetase                                          | 2.10* | 1.84* | 1.62  | 1.76* | 0.91  |
| <b>Purines, pyrimidines, nucleosides and nucleotides:</b>    |             |                                                                |       |       |       |       |       |
| <b><i>2'-Deoxyribonucleotide metabolism</i></b>              |             |                                                                |       |       |       |       |       |
| SACOL0791                                                    | <i>nrdI</i> | nrdI protein                                                   | 0.89  | 1.55* | 1.59  | 1.87* | 1.29  |
| <b>Regulatory Functions:</b>                                 |             |                                                                |       |       |       |       |       |
| <b><i>DNA interactions</i></b>                               |             |                                                                |       |       |       |       |       |
| SACOL0539                                                    | <i>purR</i> | pur operon repressor                                           | 3.68* | 0.97  | 0.66  | 1.65* | 0.88  |
| SACOL1374                                                    | <i>lexA</i> | LexA repressor                                                 | 1.02  | 1.55* | 2.09* | 1.51* | 1.11  |
| SACOL2517                                                    |             | transcriptional regulator, MerR family                         | 1.61* | 1.99* | 1.23  | 1.19  | 1.17  |
| <b>Transcription:</b>                                        |             |                                                                |       |       |       |       |       |
| <b><i>Transcription factors</i></b>                          |             |                                                                |       |       |       |       |       |
| SACOL2113                                                    | <i>rho</i>  | transcription termination factor Rho                           | 1.96* | 1.25  | 1.75* | 1.26  | 1.29* |
| <b>Transport and binding proteins:</b>                       |             |                                                                |       |       |       |       |       |
| <b><i>Amino acids, peptides and amines</i></b>               |             |                                                                |       |       |       |       |       |
| SACOL2619                                                    |             | amino acid permease                                            | 1.10  | 2.59* | 2.04* | 0.58* | 1.37* |
| <b><i>Carbohydrates, organic alcohols and acids</i></b>      |             |                                                                |       |       |       |       |       |
| SACOL2148                                                    |             | PTS system, mannitol-specific IIA component                    | 1.74* | 2.14* | 1.65* | 0.83  | 1.36* |
| <b><i>Unknown substrate</i></b>                              |             |                                                                |       |       |       |       |       |
| SACOL0688                                                    |             | ABC transporter, substrate-binding protein                     | 1.18  | 1.52* | 1.22  | 1.76* | 0.97  |
| SACOL0882                                                    |             | ABC transporter, ATP-binding protein                           | 1.20  | 2.10* | 2.04* | 1.74* | 1.55* |
| SACOL0883                                                    |             | ABC transporter, permease protein                              | 1.13  | 1.76* | 1.94* | 1.64* | 1.47* |
| SACOL0884                                                    |             | ABC transporter, substrate-binding protein                     | 1.10  | 1.80* | 1.87* | 1.46* | 1.27* |
| <b>Unknown Functions:</b>                                    |             |                                                                |       |       |       |       |       |
| <b><i>Enzymes of unknown specificity</i></b>                 |             |                                                                |       |       |       |       |       |
| SACOL0399                                                    |             | oxidoreductase, putative                                       | 1.49* | 1.67* | 1.70* | 1.00  | 1.28  |
| SACOL1543                                                    |             | oxidoreductase, aldo/keto reductase family                     | 1.77* | 1.69* | 1.98* | 0.98  | 1.41* |
| SACOL2321                                                    |             | oxidoreductase, short chain dehydrogenase/<br>reductase family | 1.35  | 1.97* | 1.67* | 1.19  | 1.25  |
| SACOL2446                                                    |             | epimerase/dehydratase, putative                                | 2.19* | 0.83  | 3.04* | 1.02  | 1.02  |
| SACOL2575                                                    |             | aminotransferase, class I                                      | 1.41  | 1.53* | 2.42* | 1.37  | 1.26  |
| SACOL2597                                                    |             | hydrolase, alpha/beta hydrolase fold family                    | 1.25  | 1.68* | 2.00* | 0.85  | 1.47* |
| SACOL2620                                                    |             | aminotransferase, class III                                    | 1.14  | 2.41* | 4.98* | 0.46* | 1.44* |
| <b><i>General</i></b>                                        |             |                                                                |       |       |       |       |       |
| SACOL0089                                                    |             | antigen, 67 kDa                                                | 2.12* | 1.75* | 1.29  | 0.88  | 1.14  |
| SACOL2088                                                    |             | sceD protein, putative                                         | 1.91* | 0.95  | 3.66  | 1.68* | 1.33  |
| <b>Hypothetical proteins:</b>                                |             |                                                                |       |       |       |       |       |
| SAV0058                                                      |             | hypothetical protein                                           | 1.30  | 2.42* | 1.57* | 0.85  | 1.41* |
| SAV0069                                                      |             | hypothetical protein                                           | 1.65* | 1.28  | 1.02  | 2.20* | 0.97  |



|                         |                                |       |       |       |       |       |
|-------------------------|--------------------------------|-------|-------|-------|-------|-------|
| SAV0394                 | hypothetical protein           | 1.00  | 1.23  | 5.19* | 0.86  | 2.74* |
| SAV0854                 | hypothetical protein           | 1.02  | 1.28  | 3.93* | 1.06  | 3.11* |
| SAV0871                 | hypothetical protein           | 0.95  | 1.19  | 2.49* | 0.95  | 1.54* |
| SAV0882                 | hypothetical protein           | 1.09  | 1.28  | 2.84* | 1.08  | 2.94* |
| SAV0884                 | hypothetical protein           | 0.93  | 1.18  | 3.28* | 1.02  | 2.40* |
| SAV0898                 | hypothetical protein           | 1.01  | 1.11  | 3.89* | 1.01  | 1.76* |
| <b><i>Conserved</i></b> |                                |       |       |       |       |       |
| SACOL0409               | conserved hypothetical protein |       |       |       |       |       |
| SACOL0467               | conserved hypothetical protein | 1.50* | 1.75* | 2.22* | 0.86  | 1.50* |
| SACOL0511               | conserved hypothetical protein | 1.38  | 1.88* | 1.43  | 0.87  | 1.54* |
| SACOL2519               | conserved hypothetical protein | 1.71* | 1.15  | 1.31  | 1.80* | 0.67  |
| SACOL2711               | conserved hypothetical protein | 1.39  | 1.61* | 1.51* | 0.79  | 1.10  |
| SACOL2723               | conserved hypothetical protein | 1.72* | 1.87* | 0.87  | 0.69* | 1.22  |

---

**Data table 1d.** Genes differentially regulated in hVISA/VISA compared to matched VSSA after vancomycin exposure, down-regulated.

| ORF ID <sup>a</sup>                                                                    | Gene         | TIGR description <sup>b</sup>                                | Isolate pair |       |       |       |       |
|----------------------------------------------------------------------------------------|--------------|--------------------------------------------------------------|--------------|-------|-------|-------|-------|
|                                                                                        |              |                                                              | 1            | 2     | 3     | 4     | 5     |
| <b>Amino acid biosynthesis:</b>                                                        |              |                                                              |              |       |       |       |       |
| <i>Aspartate family</i>                                                                |              |                                                              |              |       |       |       |       |
| SACOL0503                                                                              |              | trans-sulfuration enzyme family protein                      | 0.97         | 0.31* | 0.39* | 1.65* | 0.51* |
| <i>Glutamate family</i>                                                                |              |                                                              |              |       |       |       |       |
| SACOL0963                                                                              | <i>argH</i>  | argininosuccinate lyase                                      | 0.88         | 0.31* | 0.35* | 0.27* | 1.17  |
| SACOL0964                                                                              | <i>argG</i>  | argininosuccinate synthase                                   | 1.01         | 0.51* | 0.38  | 0.41* | 1.20  |
| <i>Serine family</i>                                                                   |              |                                                              |              |       |       |       |       |
| SACOL0502                                                                              |              | cysteine synthase/cystathionine beta-synthase family protein | 0.91         | 0.29* | 0.45* | 1.44* | 0.56* |
| <b>Biosynthesis of cofactors, prosthetic groups, and carriers:</b>                     |              |                                                              |              |       |       |       |       |
| <i>Pyridoxine</i>                                                                      |              |                                                              |              |       |       |       |       |
| SACOL0564                                                                              |              | pyridoxine biosynthesis protein                              | 0.87         | 0.65* | 0.44* | 0.78  | 0.71* |
| <b>Cell envelope:</b>                                                                  |              |                                                              |              |       |       |       |       |
| <i>Biosynthesis and degradation of murein sacculus and peptidoglycan</i>               |              |                                                              |              |       |       |       |       |
| SACOL2116                                                                              | <i>murAB</i> | UDP-N-acetylglucosamine 1-carboxyvinyltransferase 2          | 0.81         | 0.63* | 0.57* | 0.98  | 0.73* |
| <i>Biosynthesis and degradation of surface polysaccharides and lipopolysaccharides</i> |              |                                                              |              |       |       |       |       |
| SACOL1043                                                                              |              | glycosyl transferase, group 1 family protein                 | 0.40*        | 0.51* | 0.81  | 0.49  | 0.83  |
| SACOL2103                                                                              |              | UDP-N-acetylglucosamine 2-epimerase                          | 0.97         | 0.53  | 0.09* | 1.65  | 0.35* |
| <i>Other</i>                                                                           |              |                                                              |              |       |       |       |       |
| SACOL0479                                                                              |              | surface protein, putative                                    | 0.94         | 0.55* | 0.91  | 0.41* | 0.80  |
| SACOL1168                                                                              | <i>efb</i>   | fibrinogen-binding protein                                   | 0.79         | 0.44* | 0.34* | 0.39* | 0.63  |
| SACOL2451                                                                              |              | amino acid ABC transporter, amino acid-binding protein       | 0.95         | 0.62* | 0.54* | 1.13  | 0.70  |
| SACOL2520                                                                              |              | membrane protein, putative                                   | 1.19         | 0.67* | 0.66  | 1.16  | 0.58* |
| SACOL2694                                                                              | <i>geh</i>   | lipase                                                       | 1.20         | 0.65* | 0.59  | 1.11  | 0.44* |
| <b>Cellular Processes:</b>                                                             |              |                                                              |              |       |       |       |       |
| <i>Pathogenesis</i>                                                                    |              |                                                              |              |       |       |       |       |
| SACOL0095                                                                              | <i>spa</i>   | immunoglobulin G binding protein A precursor                 | 0.07*        | 0.13* | 0.25* | 0.08* | 1.49  |
| SACOL2418                                                                              |              | IgG-binding protein SBI                                      | 0.51*        | 0.32* | 0.39* | 0.35* | 0.56* |
| <i>Toxin production and resistance</i>                                                 |              |                                                              |              |       |       |       |       |
| SACOL0478                                                                              |              | exotoxin 3, putative                                         | 0.70         | 0.36* | 1.44  | 0.46* | 0.74  |
| SACOL1173                                                                              | <i>hly</i>   | alpha-hemolysin precursor                                    | 1.04         | 0.40* | 0.66  | 0.62* | 0.81  |
| SACOL1475                                                                              |              | drug transporter, putative                                   | 0.49         | 0.60* | 1.15  | 0.46* | 1.38  |
| SACOL2004                                                                              |              | leukocidin F subunit precursor, putative                     | 0.77         | 0.27* | 0.38* | 0.29* | 0.48* |
| SACOL2006                                                                              |              | Aerolysin/Leukocidin family protein                          | 0.88         | 0.44* | 0.76  | 0.39* | 0.70  |
| SACOL2523                                                                              |              | drug transporter, putative                                   | 1.06         | 0.75  | 0.54* | 0.66* | 0.75* |
| SACOL2524                                                                              |              | transcriptional regulator, MarR family                       | 0.85         | 0.51* | 0.48* | 0.68  | 0.55* |
| <b>DNA metabolism:</b>                                                                 |              |                                                              |              |       |       |       |       |
| <i>Replication, recombination, repair</i>                                              |              |                                                              |              |       |       |       |       |
| SACOL0678                                                                              |              | integrase/recombinase, phage integrase family                | 0.70         | 0.38* | 0.54* | 1.16  | 0.46* |
| <b>Energy metabolism:</b>                                                              |              |                                                              |              |       |       |       |       |
| <i>Amino acids and amines</i>                                                          |              |                                                              |              |       |       |       |       |
| SACOL1477                                                                              | <i>ilvA1</i> | threonine dehydratase, catabolic                             | 0.48         | 0.47* | 0.80  | 0.26* | 1.80  |
| SACOL1478                                                                              | <i>ald1</i>  | alanine dehydrogenase                                        | 0.49         | 0.49* | 0.71  | 0.25* | 1.26  |

|                                                           |              |                                                                                 |       |       |       |       |       |
|-----------------------------------------------------------|--------------|---------------------------------------------------------------------------------|-------|-------|-------|-------|-------|
| SACOL1593                                                 |              | glycine cleavage system P protein, subunit 2                                    | 0.99  | 0.59* | 0.57* | 0.82  | 0.82  |
| SACOL2654                                                 | <i>arcC2</i> | carbamate kinase                                                                | 1.15  | 0.66* | 0.89  | 0.48* | 0.97  |
| <b>Anaerobic</b>                                          |              |                                                                                 |       |       |       |       |       |
| SACOL0204                                                 | <i>pflB</i>  | formate acetyltransferase                                                       | 0.47  | 0.28* | 0.21* | 0.29* | 0.71* |
| SACOL0205                                                 | <i>pflA</i>  | pyruvate formate-lyase-activating enzyme                                        | 0.51  | 0.28* | 0.22* | 0.35* | 0.63* |
| <b>ATP-proton motive force interconversion</b>            |              |                                                                                 |       |       |       |       |       |
| SACOL2096                                                 | <i>atpG</i>  | ATP synthase F1, gamma subunit                                                  | 0.97  | 0.58  | 0.59* | 0.58* | 0.82  |
| SACOL2097                                                 | <i>atpA</i>  | ATP synthase F1, alpha subunit                                                  | 1.08  | 0.58  | 0.57* | 0.63* | 0.91  |
| SACOL2099                                                 | <i>atpF</i>  | ATP synthase F0, B subunit                                                      | 1.11  | 0.58  | 0.55* | 0.64* | 0.87  |
| SACOL2100                                                 | <i>atpE</i>  | ATP synthase F0, C subunit                                                      | 1.06  | 0.46* | 0.67* | 0.65* | 0.93  |
| SACOL2101                                                 | <i>atpB</i>  | ATP synthase F0, A subunit                                                      | 1.22  | 0.54  | 0.54* | 0.63* | 0.93  |
| <b>Biosynthesis and degradation of polysaccharides</b>    |              |                                                                                 |       |       |       |       |       |
| SACOL2183                                                 | <i>lacD</i>  | tagatose 1,6-diphosphate aldolase                                               | 0.25* | 0.47* | 0.91  | 0.92  | 0.60  |
| <b>Electron transport</b>                                 |              |                                                                                 |       |       |       |       |       |
| SACOL0494                                                 | <i>nuoF</i>  | NADH dehydrogenase I, F subunit                                                 | 0.88  | 0.50* | 0.64  | 0.51* | 0.92  |
| <b>Fermentation</b>                                       |              |                                                                                 |       |       |       |       |       |
| SACOL0660                                                 |              | alcohol dehydrogenase, zinc-containing                                          | 0.70  | 0.68  | 0.57* | 0.50* | 1.02  |
| <b>TCA cycle</b>                                          |              |                                                                                 |       |       |       |       |       |
| SACOL1159                                                 | <i>sdhA</i>  | succinate dehydrogenase, flavoprotein subunit                                   | 0.90  | 0.61* | 0.48* | 0.78  | 0.65* |
| SACOL1262                                                 | <i>sucC</i>  | succinyl-CoA synthase, beta subunit                                             | 1.13  | 0.56* | 0.59* | 0.85  | 0.69  |
| SACOL1448                                                 | <i>sucB</i>  | 2-oxoglutarate dehydrogenase, E2 component, dihydroipoamide succinyltransferase | 1.39  | 0.55  | 0.42* | 0.89  | 0.54* |
| SACOL1449                                                 | <i>sucA</i>  | 2-oxoglutarate dehydrogenase, E1 component                                      | 1.55* | 0.60* | 0.53* | 1.11  | 0.64  |
| <b>Protein fate:</b>                                      |              |                                                                                 |       |       |       |       |       |
| <b>Protein folding and stabilization</b>                  |              |                                                                                 |       |       |       |       |       |
| SACOL1638                                                 | <i>grpE</i>  | heat shock protein GrpE                                                         | 0.81  | 0.66* | 0.76  | 0.70* | 0.57* |
| SACOL2016                                                 | <i>groEL</i> | chaperonin, 60 kDa                                                              | 0.56* | 0.83  | 0.68* | 0.64* | 0.70* |
| SACOL2017                                                 | <i>groES</i> | chaperonin, 10 kDa                                                              | 0.52* | 0.61* | 0.73  | 0.70* | 0.57* |
| <b>Protein synthesis:</b>                                 |              |                                                                                 |       |       |       |       |       |
| <b>tRNA and rRNA base modification</b>                    |              |                                                                                 |       |       |       |       |       |
| SACOL1962                                                 | <i>gatC</i>  | glutamyl-tRNA(Gln) amidotransferase, C subunit                                  | 0.63* | 0.72  | 0.89  | 0.57* | 0.89  |
| <b>Translation factors</b>                                |              |                                                                                 |       |       |       |       |       |
| SACOL1278                                                 | <i>frr</i>   | ribosome recycling factor                                                       | 0.64* | 0.54* | 0.61* | 0.84  | 0.70* |
| <b>Purines, pyrimidines, nucleosides and nucleotides:</b> |              |                                                                                 |       |       |       |       |       |
| <b>Nucleotide and nucleoside interconversions</b>         |              |                                                                                 |       |       |       |       |       |
| SACOL1277                                                 | <i>pyrH</i>  | uridylate kinase                                                                | 0.61* | 0.61  | 0.59* | 0.74  | 0.79  |
| <b>Pyrimidine ribonucleotide biosynthesis</b>             |              |                                                                                 |       |       |       |       |       |
| SACOL1212                                                 | <i>pyrB</i>  | aspartate carbamoyltransferase                                                  | 0.46* | 0.33* | 0.94  | 0.62  | 0.50* |
| SACOL1213                                                 | <i>pyrC</i>  | dihydroorotase                                                                  | 0.46* | 0.44* | 0.73  | 0.92  | 0.65* |
| SACOL1214                                                 | <i>carA</i>  | carbamoyl-phosphate synthase, small subunit                                     | 0.54* | 0.61  | 0.74  | 0.84  | 0.51* |
| SACOL1215                                                 | <i>carB</i>  | carbamoyl-phosphate synthase, large subunit                                     | 0.59  | 0.73  | 0.58* | 0.88  | 0.43* |
| <b>Salvage of nucleosides and nucleotides</b>             |              |                                                                                 |       |       |       |       |       |
| SACOL2128                                                 | <i>pdp</i>   | pyrimidine-nucleoside phosphorylase                                             | 0.76  | 0.47* | 0.48* | 0.66* | 0.70  |
| <b>Regulatory Functions:</b>                              |              |                                                                                 |       |       |       |       |       |
| <b>DNA interactions</b>                                   |              |                                                                                 |       |       |       |       |       |
| SACOL0518                                                 |              | transcriptional regulator, GntR family                                          | 0.98  | 1.13  | 0.65* | 0.62* | 0.99  |
| SACOL1639                                                 | <i>hrcA</i>  | heat-inducible transcription repressor HrcA                                     | 0.83  | 0.80  | 0.64* | 0.78  | 0.58* |
| <b>RNA interactions</b>                                   |              |                                                                                 |       |       |       |       |       |
| SACOL1210                                                 | <i>pyrR</i>  | pyrimidine operon regulatory protein                                            | 0.58  | 0.39* | 1.29  | 0.37* | 0.64  |
| <b>Other</b>                                              |              |                                                                                 |       |       |       |       |       |
| SACOL1398                                                 |              | transcriptional regulator, putative                                             | 0.79  | 1.28  | 0.51* | 0.48* | 0.63* |
| MW1960                                                    | <i>agrB</i>  | accessory gene regulator B                                                      | 0.74  | 0.45* | 0.15* | 1.20  | 0.42* |
| SA1842                                                    | <i>agrB</i>  | accessory gene regulator B                                                      | 0.73  | 0.45* | 0.15* | 1.22  | 0.40* |
| SACOL2023                                                 | <i>agrB</i>  | accessory gene regulator protein B                                              | 0.65* | 0.31* | 0.10* | 1.15  | 0.29* |
| SACOL2025                                                 | <i>argC2</i> | accessory gene regulator protein C                                              | 0.64  | 0.35* | 0.10* | 1.12  | 0.31* |

|                                                  |             |                                                                              |       |       |       |       |       |
|--------------------------------------------------|-------------|------------------------------------------------------------------------------|-------|-------|-------|-------|-------|
| SACOL2026                                        | <i>agrA</i> | accessory gene regulator protein A                                           | 0.88  | 0.49* | 0.15* | 1.18  | 0.37* |
| <b>Signal transduction:</b>                      |             |                                                                              |       |       |       |       |       |
| <b>2-component system</b>                        |             |                                                                              |       |       |       |       |       |
| SACOL0765                                        | <i>saeS</i> | sensor histidine kinase                                                      | 0.81  | 0.50* | 0.44* | 0.90  | 0.67  |
| SACOL0766                                        | <i>saeR</i> | DNA-binding response regulator                                               | 0.80  | 0.39* | 0.37* | 0.85  | 0.60* |
| <b>Transport and binding proteins:</b>           |             |                                                                              |       |       |       |       |       |
| <b>Amino acids, peptides and amines</b>          |             |                                                                              |       |       |       |       |       |
| SACOL1110                                        |             | spermidine/putrescine ABC transporter, permease protein                      | 0.70  | 0.46* | 0.52* | 0.81  | 1.08  |
| SACOL1111                                        |             | spermidine/putrescine ABC transporter, spermidine/putrescine-binding protein | 0.82  | 0.57* | 0.58* | 0.52* | 0.85  |
| SACOL1476                                        |             | amino acid permease                                                          | 0.43* | 0.41* | 0.65  | 0.27* | 1.32  |
| SACOL1915                                        |             | amino acid ABC transporter, ATP-binding protein                              | 0.95  | 0.50* | 0.46  | 0.37* | 1.08  |
| SACOL1916                                        |             | amino acid ABC transporter, permease/substrate-binding protein               | 0.82  | 0.38* | 0.38* | 0.38* | 0.98  |
| SACOL2452                                        |             | amino acid ABC transporter, permease protein                                 | 0.89  | 0.57* | 0.57* | 1.02  | 0.59* |
| SACOL2453                                        |             | amino acid ABC transporter, ATP-binding protein                              | 0.85  | 0.61* | 0.60* | 0.95  | 0.63* |
| <b>Carbohydrates, organic alcohols and acids</b> |             |                                                                              |       |       |       |       |       |
| SACOL0175                                        |             | PTS system, IIABC components                                                 | 0.85  | 0.39* | 0.43* | 0.31* | 0.84  |
| SACOL0454                                        |             | sodium:dicarboxylate symporter family protein                                | 0.55* | 0.58* | 0.52* | 0.61* | 0.95  |
| SACOL2181                                        | <i>lacE</i> | PTS system, lactose-specific IIBC components                                 | 0.27* | 0.63* | 0.79  | 0.86  | 0.89  |
| SACOL2363                                        |             | L-lactate permease                                                           | 0.85  | 0.78  | 0.57* | 0.40* | 0.81  |
| SACOL2376                                        |             | PTS system, sucrose-specific IIBC components, putative                       | 1.17  | 0.64* | 0.38* | 0.62* | 0.61* |
| SACOL2552                                        |             | PTS system, IIABC components                                                 | 0.99  | 0.45* | 0.35* | 0.41* | 0.58* |
| <b>Cations and iron carrying compounds</b>       |             |                                                                              |       |       |       |       |       |
| SACOL0946                                        |             | Na <sup>+</sup> /H <sup>+</sup> antiporter family protein                    | 0.70  | 0.48* | 0.57  | 0.45* | 0.72  |
| <b>Nucleosides, purines, pyrimidines</b>         |             |                                                                              |       |       |       |       |       |
| SACOL1211                                        | <i>uraA</i> | uracil permease                                                              | 0.55* | 0.36* | 0.73  | 0.79  | 0.77  |
| <b>Other</b>                                     |             |                                                                              |       |       |       |       |       |
| SACOL0303                                        |             | acid phosphatase5-nucleotidase, lipoprotein e(P4) family                     | 0.80  | 0.52* | 0.62* | 0.39* | 0.82  |
| <b>Unknown substrate</b>                         |             |                                                                              |       |       |       |       |       |
| SACOL0158                                        |             | ABC transporter, ATP-binding protein, authentic frameshift                   | 0.99  | 0.41* | 0.46* | 1.21  | 0.67  |
| SACOL0159                                        |             | ABC transporter, permease protein                                            | 1.10  | 0.41* | 0.26* | 1.27  | 0.53* |
| SACOL0506                                        |             | ABC transporter, substrate-binding protein                                   | 0.81  | 0.62* | 0.78  | 0.72* | 0.60* |
| <b>Unknown Functions:</b>                        |             |                                                                              |       |       |       |       |       |
| <b>Enzymes of unknown specificity</b>            |             |                                                                              |       |       |       |       |       |
| SACOL0569                                        |             | ATP:guanido phosphotransferase family protein                                | 0.99  | 0.72  | 0.81  | 0.63* | 0.61* |
| <b>General</b>                                   |             |                                                                              |       |       |       |       |       |
| SACOL0276                                        | <i>yukA</i> | diarrheal toxin                                                              | 1.77* | 0.58* | 0.68  | 0.56* | 0.98  |
| SACOL0507                                        |             | LysM domain protein                                                          | 0.72  | 0.57* | 0.51* | 0.72  | 0.87  |
| SACOL0772                                        |             | exsB protein                                                                 | 0.89  | 0.63* | 1.07  | 0.54* | 1.35  |
| SACOL1164                                        |             | fibrinogen binding-related protein                                           | 0.97  | 0.63  | 0.52* | 0.55* | 0.77  |
| SACOL1169                                        |             | fibrinogen-binding protein precursor-related protein                         | 0.67  | 0.43* | 0.40* | 0.43* | 0.64  |
| SACOL2203                                        |             | ClpA-related protein                                                         | 0.89  | 0.64  | 0.12* | 1.56  | 0.33* |
| SACOL2484                                        |             | alkylhydroperoxidase, AhpD family                                            | 1.26  | 0.49* | 0.75  | 0.83  | 0.52* |
| SACOL2584                                        | <i>isaA</i> | immunodominant antigen A                                                     | 0.84  | 0.36* | 0.89  | 0.56* | 0.76  |
| <b>Hypothetical proteins:</b>                    |             |                                                                              |       |       |       |       |       |
| MW1884                                           |             | hypothetical protein                                                         | 0.58* | 0.63* | 0.78  | 1.25  | 0.93  |
| MW2407                                           |             | hypothetical protein                                                         | 0.05* | 0.12* | 0.21* | 0.05* | 1.41  |
| SACOL0272                                        |             | hypothetical protein                                                         | 1.43  | 0.40* | 0.64  | 0.47* | 0.82  |
| SACOL1846                                        |             | hypothetical protein                                                         | 0.99  | 0.17* | 0.45* | 0.40* | 0.48* |
| SAV0411                                          |             | exotoxin homolog                                                             | 0.82  | 0.44* | 0.95  | 0.60* | 0.68* |

|                  |                                          |       |       |       |       |       |
|------------------|------------------------------------------|-------|-------|-------|-------|-------|
| SAV1425          | amino acid permease homolog              | 0.48  | 0.52* | 0.69  | 0.43* | 1.08  |
| <b>Conserved</b> |                                          |       |       |       |       |       |
| SACOL0157        | conserved hypothetical protein           | 1.15  | 0.24* | 0.21* | 1.07  | 0.30* |
| SACOL0160        | conserved hypothetical protein           | 1.04  | 0.42* | 0.34* | 1.12  | 0.56* |
| SACOL0271        | conserved hypothetical protein           | 3.37* | 0.56  | 0.65* | 0.29* | 0.61* |
| SACOL0495        | conserved hypothetical protein           | 0.74  | 0.37* | 0.47* | 0.45* | 0.83  |
| SACOL0565        | conserved hypothetical protein           | 0.86  | 0.68* | 0.47* | 0.76  | 0.65* |
| SACOL0625        | conserved hypothetical protein           | 0.62  | 1.12  | 0.52* | 0.96  | 0.56* |
| SACOL0710        | conserved hypothetical protein           | 0.73  | 0.75  | 0.37* | 1.42* | 0.64* |
| SACOL0767        | conserved hypothetical protein           | 0.81  | 0.26* | 0.27* | 0.81  | 0.54* |
| SACOL0768        | conserved hypothetical protein           | 0.76  | 0.33* | 0.34* | 0.73  | 0.38* |
| SACOL1481        | conserved hypothetical protein           | 0.89  | 0.62* | 1.21  | 0.45* | 1.15  |
| SACOL1847        | conserved hypothetical protein, putative | 0.91  | 0.26* | 0.54  | 0.36* | 0.51* |
| SACOL2034        | conserved hypothetical protein           | 0.83  | 0.49* | 0.58* | 1.06  | 0.78  |
| SACOL2464        | conserved hypothetical protein           | 0.61* | 0.71  | 0.87  | 1.29  | 0.65* |
| SAV0040          | conserved hypothetical protein           | 0.77  | 0.76  | 0.61* | 0.81  | 0.67* |
| SAV2510          | conserved hypothetical protein           | 0.49* | 0.82  | 0.93  | 0.41* | 1.19  |

<sup>a</sup>Prefix SACOL, MRSACOL gene ID; SA, N315 gene ID; MW, MW2 gene ID; SAV, Mu50 gene ID.

<sup>b</sup>The Institute for Genomic Research gene function category. Note. \*denotes P-value for fold change <0.05
